# Supplementary material for: Improved osteogenesis and angiogenesis of magnesium-doped calcium phosphate cement via macrophage immunomodulation
Source: Royal Society of Chemistry journal article supplement (doi:10.1039/c6bm00290k), 2016-01-01
Supplement: c6bm00290k1.pdf [file c6bm00290k1.pdf]

## Supplementary Information

# Improved osteogenesis and angiogenesis of magnesium-doped calcium phosphate cement via macrophage immunomodulation

Meng Wang,<sup>ac</sup> Yuanman Yu,<sup>ac</sup> Kai Dai,<sup>ac</sup> Zhengyu Ma,<sup>ac</sup> Yang Liu,<sup>ac</sup> Jing Wang<sup>\*ac</sup> and  
Changsheng Liu<sup>\*abc</sup>

<sup>a</sup>Key Laboratory for Ultrafine Materials of Ministry of Education, East China University of Science and Technology, Shanghai, 200237, People's Republic of China

<sup>b</sup>The State Key Laboratory of Bioreactor Engineering, East China University of Science and Technology, Shanghai, 200237, People's Republic of China

<sup>c</sup>Engineering Research Center for Biomedical Materials of Ministry of Education, East China University of Science and Technology, Shanghai, 200237, People's Republic of China

Email Address: biomatwj@163.com (Jing Wang); liucs@ecust.edu.cn (Changsheng Liu).

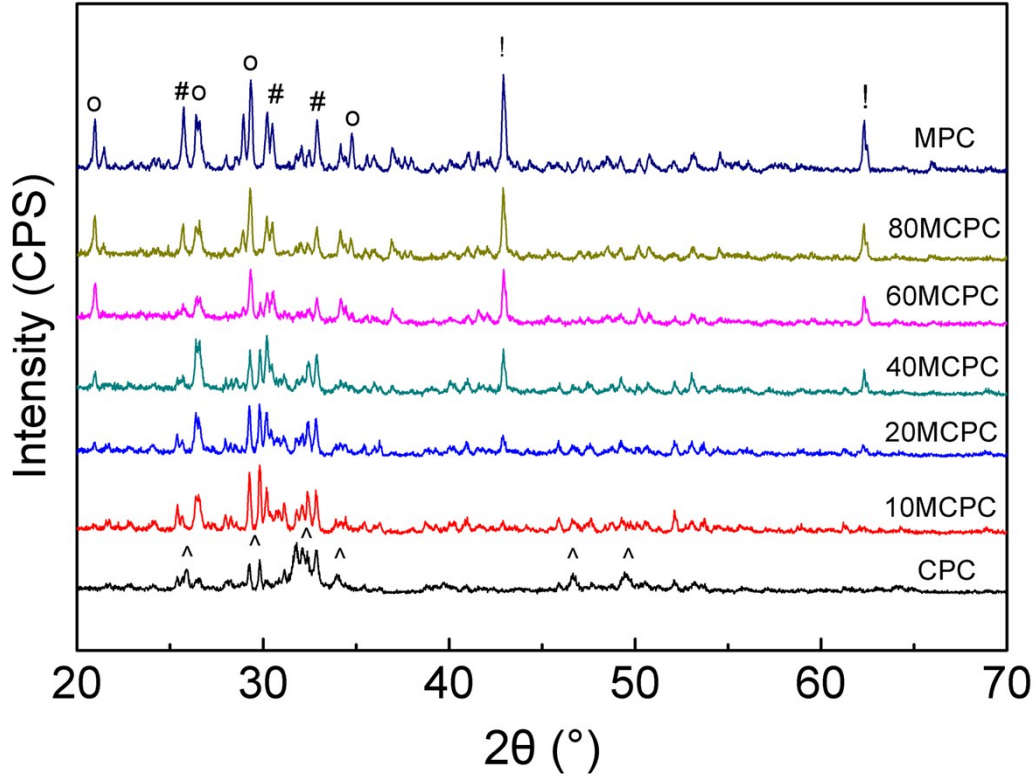

**Fig. S1** XRD patterns of CPC, MCPCs and MPC after setting for 3 days. ^: Hydroxyapatite. o:  $\text{Ca}_3(\text{PO}_4)_2$ . #:  $\text{Mg}_2(\text{PO}_4)_3$ . !: MgO. The cement samples were grinded after setting for 3 days and then analyzed by X-ray diffraction (XRD, Rigaku D/Max 2550, Cu  $K\alpha$  radiation, Japan). CPC displayed typical peaks of hydroxyapatite (HA), while MPC contained peaks of magnesium phosphate ( $\text{Mg}_3(\text{PO}_4)_2$ ) and calcium phosphate ( $\text{Ca}_3(\text{PO}_4)_2$ ) with the residual of MgO.

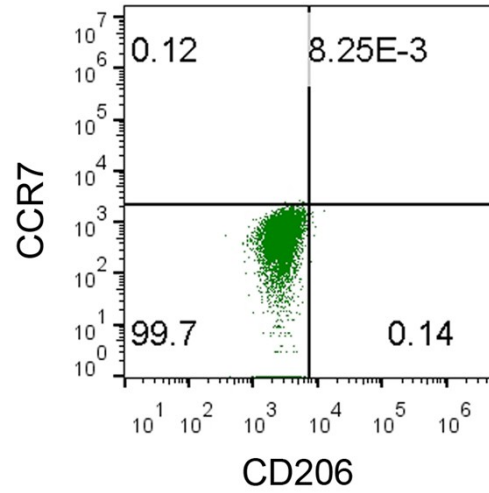

**Fig. S2** Isotype control of RAW 264.7 cells in flow cytometry. Cells were stained with Alexa Fluor® 647 rat IgG2a,  $\kappa$  and Alexa Fluor® 488 rat IgG2a,  $\kappa$ .

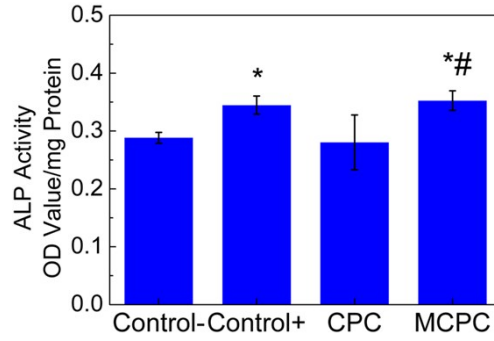

**Fig. S3** The ALP activity of BMSCs in transwell co-culture system on day 7. \*: Significant difference ( $p < 0.05$ ) for Control+, CPC and MCPC groups compared with Control-. #: Significant difference ( $p < 0.05$ ) for MCPC group compared with CPC group.

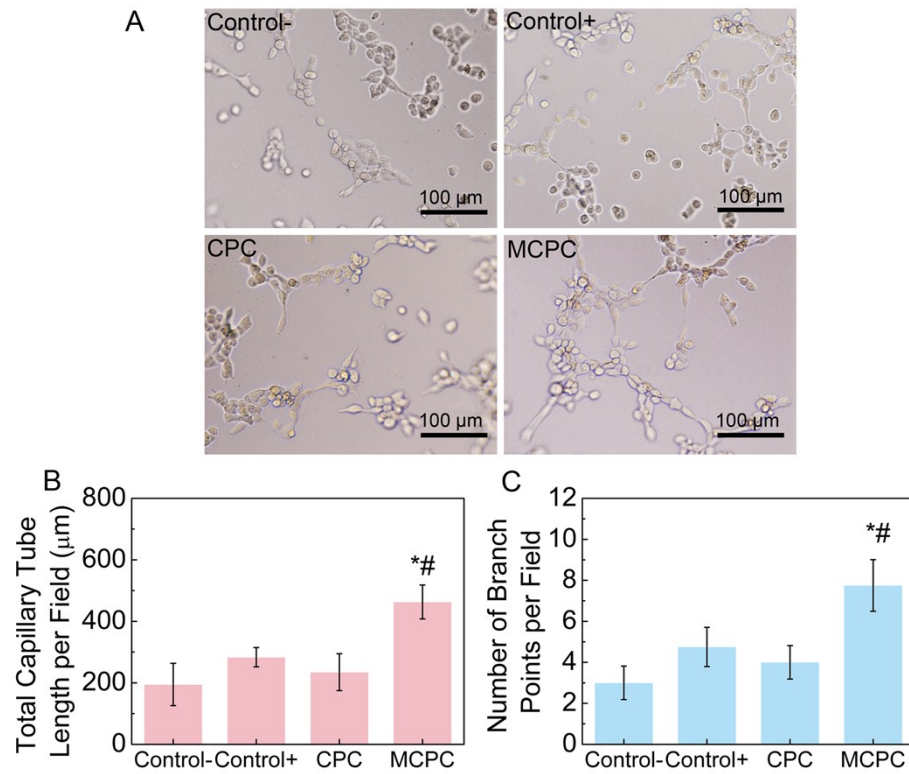

**Fig. S4** Representative images of *in vitro* sprouting of HUVECs cultured in transwell inserts (A), quantitative analysis of the total capillary tube length (B) and number of branch points (C). \*: Significant difference ( $p < 0.05$ ) for Control+, CPC and MCPC groups compared with Control-. #: Significant difference ( $p < 0.05$ ) for MCPC group compared with CPC group.
